# Supplementary material for: Preparation of crumpled reduced graphene oxide–poly(p-phenylenediamine) hybrids for the detection of dopamine
Source: Royal Society of Chemistry journal article supplement (doi:10.1039/c3ta12594g), 2013-01-01
Supplement: c3ta12594g.pdf [file c3ta12594g.pdf]

## Supporting Information

# Preparation of crumpled reduced graphene oxide-poly(*p*-phenylenediamine) hybrids for detection of dopamine

Sen Liu, Bo Yu and Tong Zhang\*

State Key Laboratory on Integrated Optoelectronics, College of Electronic Science  
and Engineering, Jilin University, Changchun 130012, P.R. China

\*Corresponding authors:

E-mail address: zhangtong@jlu.edu.cn (T. Zhang)

Tel.: +86 431 85168385; Fax: +86 431 85168270.

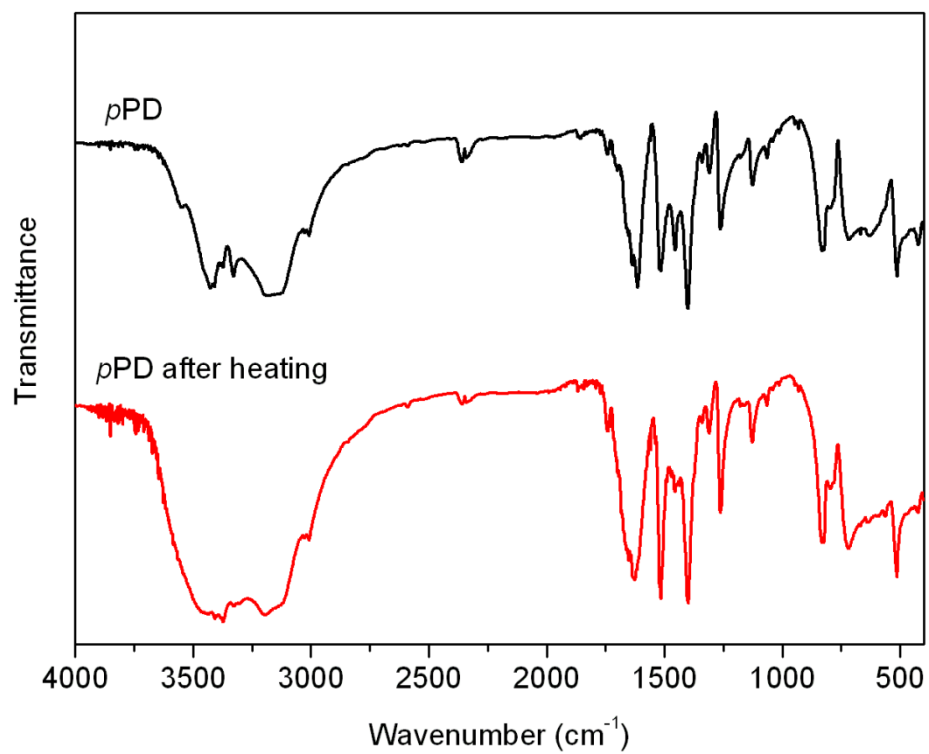

**Fig. S1** FT-IR spectra of *pPD* and *pPD* after heating at 80 °C for 2 h in the absence of GO.

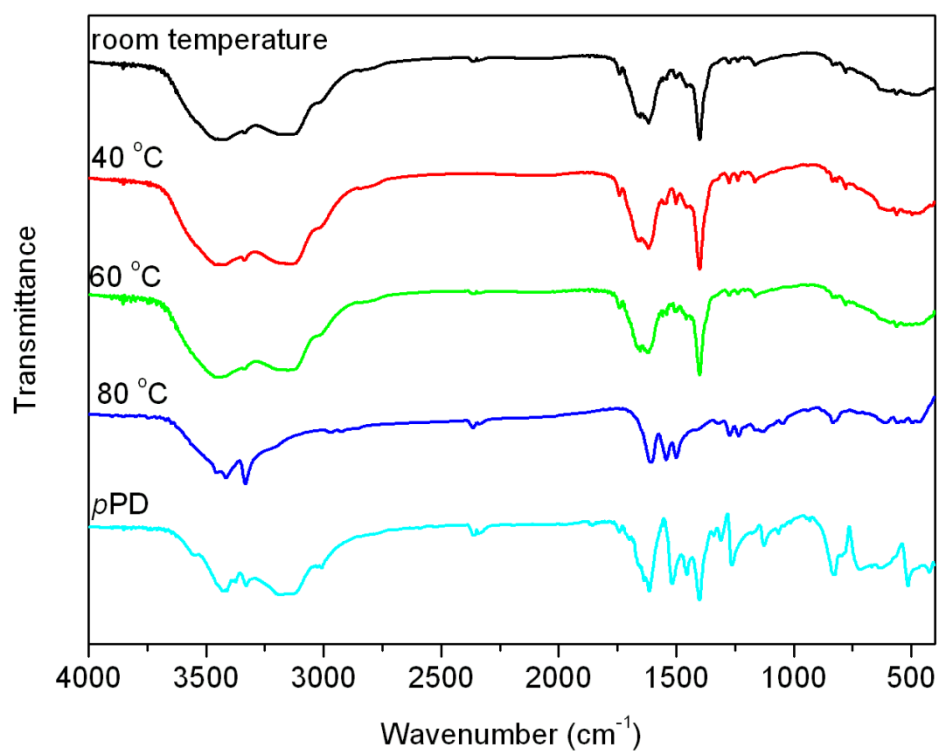

**Fig. S2** FT-IR spectra of rGO-PpPD hybrids prepared at room temperature, 40 °C, 60 °C, 80 °C and pPD powder.

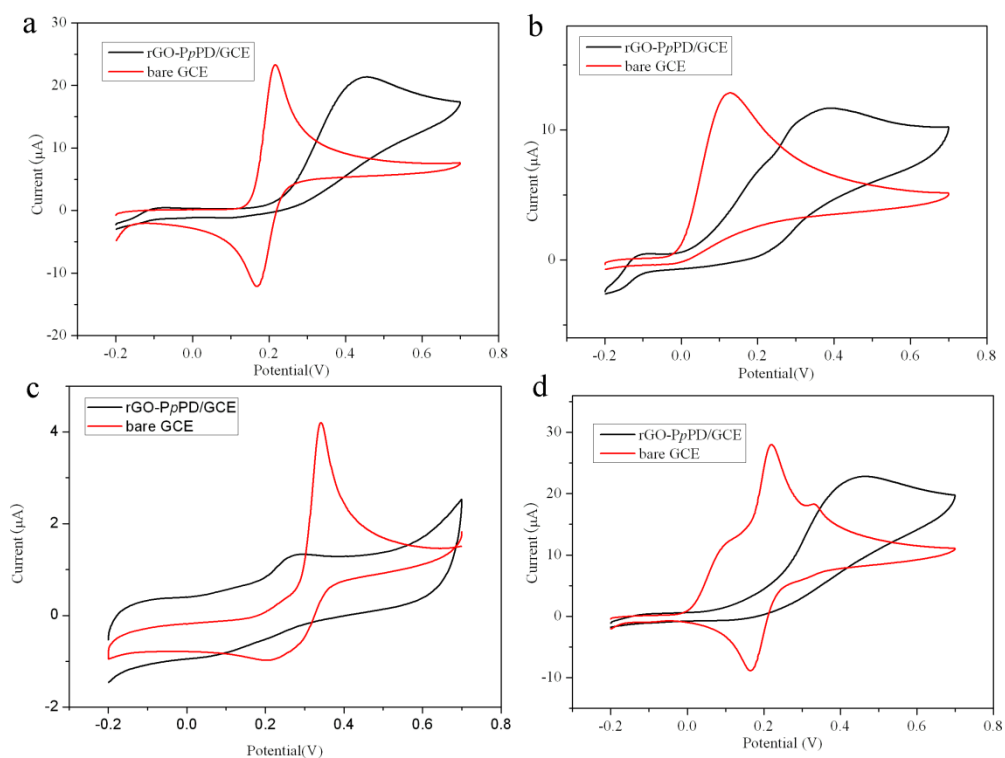

**Fig. S3** Cyclic voltammeters (CVs) of a bare GCE (red line), and rGO-PpPD hybrids prepared at 60 °C modified GCE (black line) in 0.2 M PBS at pH 7.0 in the presence of (a) 1.0 mM DA, (b) 1.0 mM AA, (c) 1.0 mM UA and (d) a mixture of 1.0 mM DA, 1.0 mM AA and 1.0 mM UA, respectively (scan rate: 0.05 V/s).

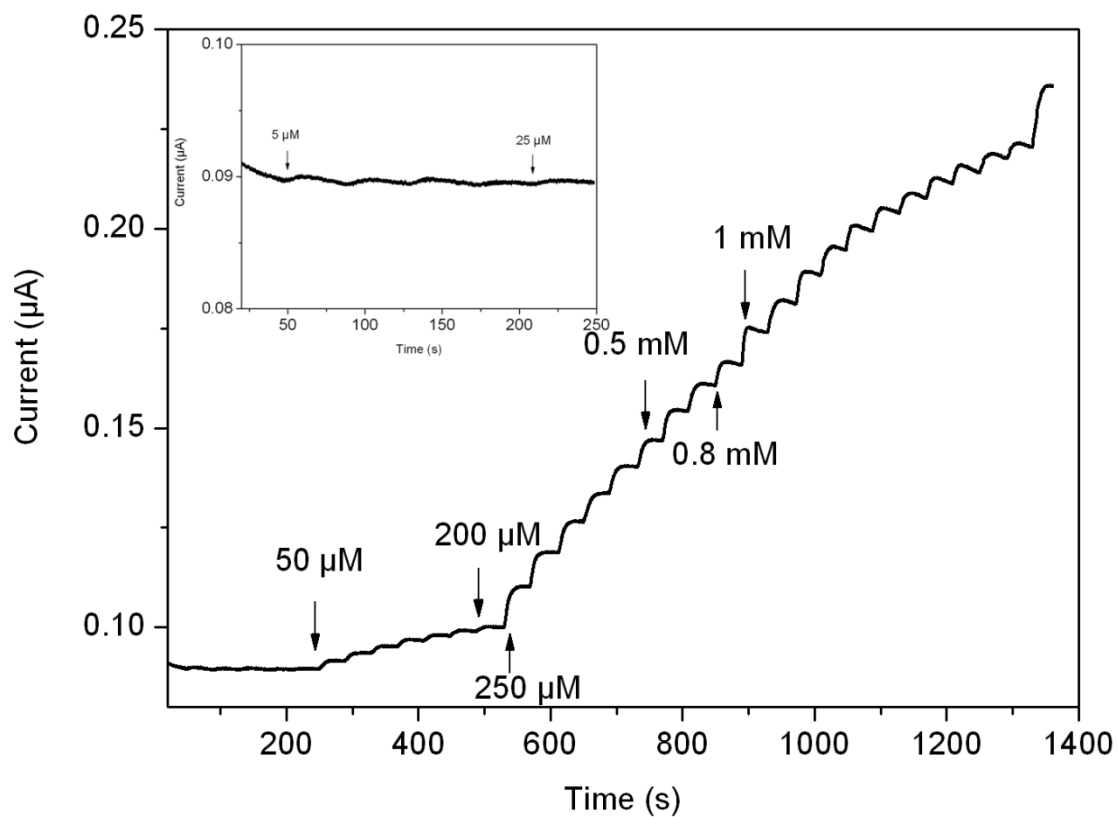

**Fig. S4** Typical steady-state response of the rGO-PpPD prepared at 60 °C modified GCE to successive injection of DA into the PBS buffer containing 1.0 mM AA under stirring. Applied potential: +0.30 V; supporting electrolyte: 0.2 M PBS of pH 7.0.
